# Supplementary material
Source: publisher figshare collection journal article supplement (https://karger.figshare.com/ndownloader/files/30981394)
Supplement: Supplementary file 1 [file 30981394]

| Supplemental Table 3 | | The mean values of distances from all points on the mask to the modiolus midpoint (MM) | | | | | | | |
| --- | --- | --- | --- | --- | --- | --- | --- | --- | --- |
|  |  | A (25mm) | B (30mm) | C (35mm) | D (40mm) | P | Pab | Pac | Pad |
| Control group | P20 | 39.94 ± 1.75 | 42.92 ± 1.62 | 46.08 ± 1.53 | 49.24 ± 1.42 | <0.05 | <0.05 | <0.05 | <0.05 |
| N=30 | P30 | 40.27 ± 1.75 | 43.30 ± 1.59 | 46.59 ± 1.36 | 49.80 ± 1.42 | <0.05 | <0.05 | <0.05 | <0.05 |
|  | P40 | 40.40 ± 1.71 | 43.63 ± 1.58 | 46.82 ± 1.47 | 50.26 ± 1.42 | <0.05 | <0.05 | <0.05 | <0.05 |
| CAA group | P20 | 41.64 ± 1.86 | 44.46 ± 1.77 | 47.34 ± 1.76 | 50.88 ± 2.68 | <0.05 | <0.05 | <0.05 | <0.05 |
| N=30 | P30 | 42.25 ± 1.99 | 45.05 ± 1.88 | 48.07 ± 1.81 | 51.23 ± 1.85 | <0.05 | <0.05 | <0.05 | <0.05 |
|  | P40 | 42.78 ± 2.12 | 45.61 ± 2.01 | 48.68 ± 2.01 | 51.96 ± 2.04 | <0.05 | <0.05 | <0.05 | <0.05 |
| CAS group | P20 | 40.69 ± 0.96 | 43.53 ± 1.00 | 46.47 ± 0.93 | 49.50 ± 0.82 | <0.05 | <0.05 | <0.05 | <0.05 |
| N=30 | P30 | 41.20 ± 0.99 | 44.11 ± 1.04 | 46.91 ± 1.35 | 50.35 ± 1.13 | <0.05 | <0.05 | <0.05 | <0.05 |
|  | P40 | 41.11 ± 1.91 | 44.68 ± 1.05 | 47.87 ± 1.15 | 51.10 ± 1.23 | <0.05 | <0.05 | <0.05 | <0.05 |
| Pab, Pac, Pad = p value for differences between A and B, between A and C, and between A and D, respectively | | | | | | | | | |
